# Supplementary material
Source: Springer Nature journal article supplement (https://www.springermedizin.de/resource/supplementary/13002_2013_450_MOESM2_ESM.pdf/9626790)

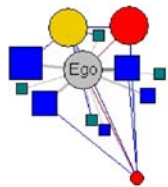

A1

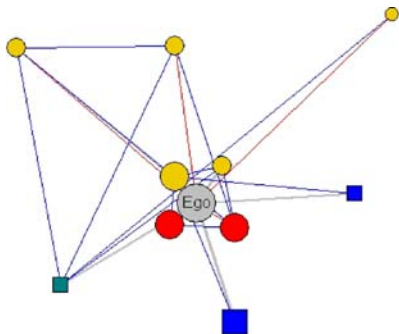

B1

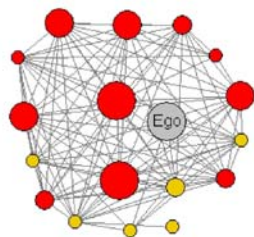

P1

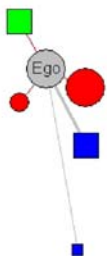

A2

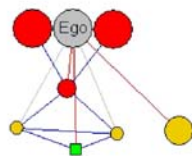

B2

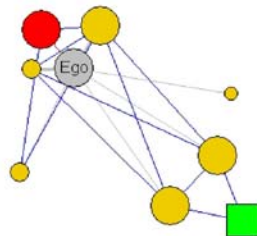

P2

Supplement: MOESM2 [file 9626790]
